# Supplementary material for: CDK 4/6 Inhibitor Palbociclib (PD0332991) in Rb+ Advanced Breast Cancer: Phase II Activity, Safety, and Predictive Biomarker Assessment
Source: Oxford University Press journal article supplement (doi:10.1158/1078-0432.ccr-14-2258), 2014-12-11
Supplement: 10780432ccr142258-sup-137180_1_supp_2735512_nppypl.docx [file 10780432ccr142258-sup-137180_1_supp_2735512_nppypl.docx]

Supplemental Table 1: Predictive biomarker assessment

| **Biomarker** | **N (%)** | **OR response vs. non-response** | **P-value** | **HR PFS** | **P-value** |
| --- | --- | --- | --- | --- | --- |
| **Rb localization**  Nuclear only  Cytoplasmic/Both | N=37  32 (86%)  5 (14%) | 3.24  Reference | 0.444 | 0.69  Reference | 0.452 |
| **Ki67**  ≤10  >10 | N=30  21 (70%)  9 (30%) | Reference  1.21 | 0.842 | Reference  1.13 | 0.762 |
| **p16 nuclear expression**  Present  Absent | N=30  19 (63%)  11 (37%) | 0.50  Reference | 0.453 | 0.98  Reference | 0.950 |
| ***CCND1* amplification**  Non-Amplified  Amplified | N=34  25 (74%)  9 (26%) | Reference  1.5 | 0.676 | Reference  0.84 | 0.652 |
